# Supplementary material for: An ultrasensitive electrochemiluminescence biosensor for the detection of total bacterial count in environmental and biological samples based on a novel sulfur quantum dot luminophore
Source: Royal Society of Chemistry journal article supplement (doi:10.1039/d2an00153e), 2022-01-01
Supplement: d2an00153e1.pdf [file d2an00153e1.pdf]

*-Supporting information-*

**An ultrasensitive electrochemiluminescence biosensor of total bacterial count in environmental and biological samples based on a novel sulfur quantum dots luminophore**

Xiaobin Wang, Yuqing Zhao, Qing Hua, Jiaojiao Lu, Feiyan Tang, Wenjie Sun, Feng Luan, Xuming Zhuang\*, Chunyuan Tian\*

College of Chemistry and Chemical Engineering, Yantai University, Yantai 264005, China.

\*Corresponding author.

E-mail address: xmzhuang@iccas.ac.cn (X. Zhuang); cytian@ytu.edu.cn (C. Tian).

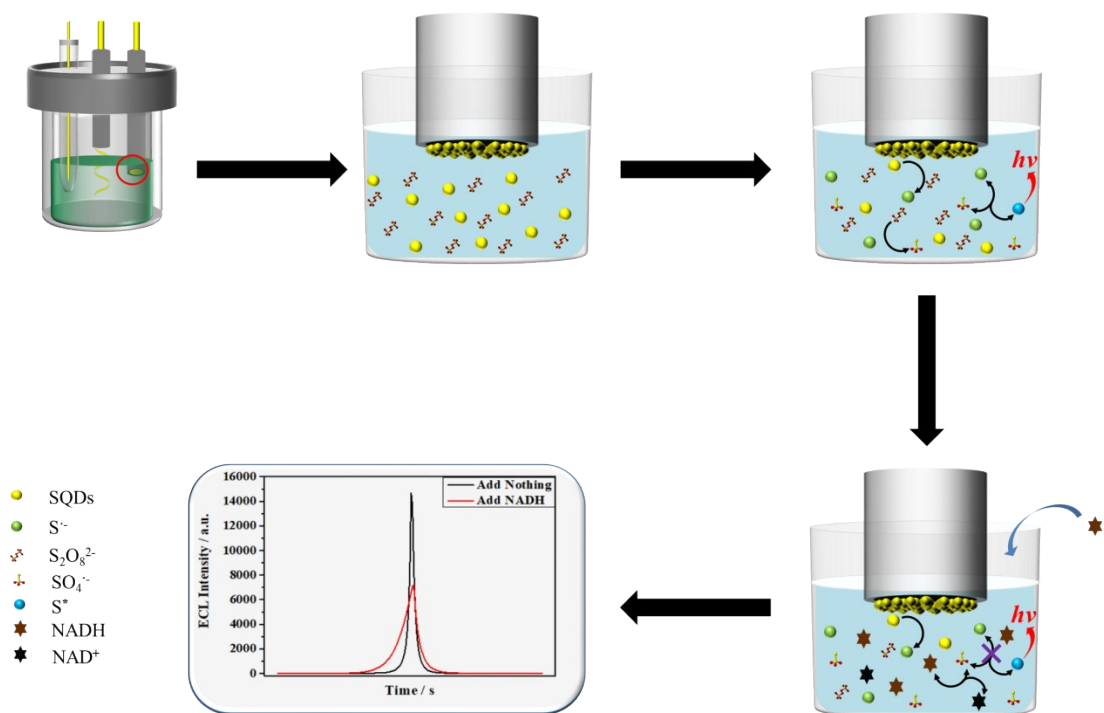

**Scheme S1.** Mechanism of the SQDs/GCE/K<sub>2</sub>S<sub>2</sub>O<sub>8</sub> for detecting NADH.

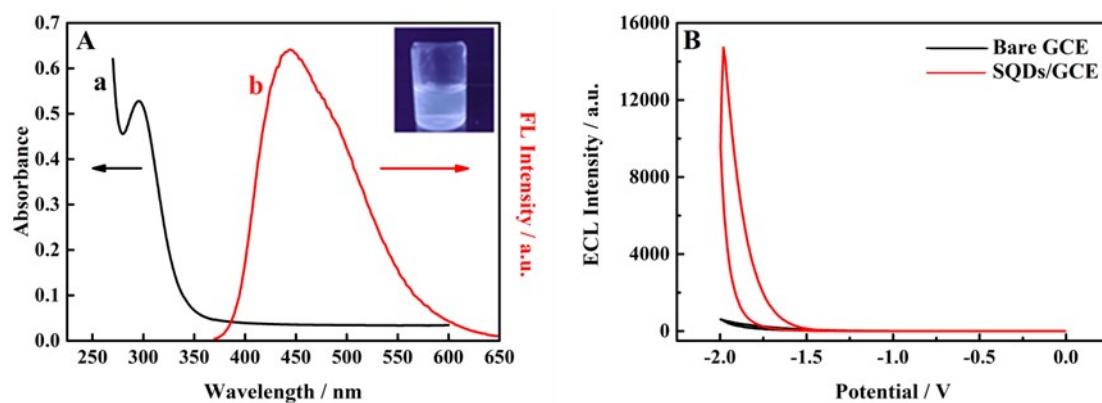

**Fig. S1.** (A) UV-vis absorption spectra of the SQDs (a). Fluorescence emission ( $\lambda_{\text{ex}} = 365 \text{ nm}$ ) spectra of the SQDs (b). (B) ECL curves of the bare electrode and SQDs electrode.

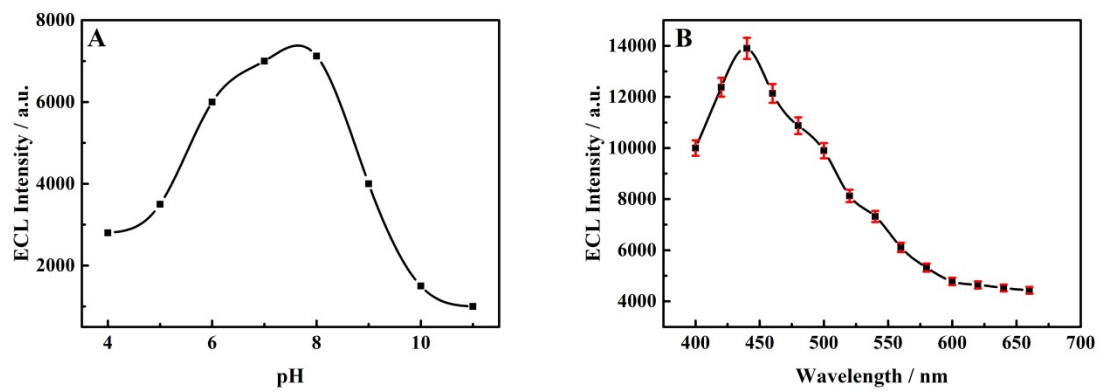

**Fig. S2.** The optimization about pH of SQDs electrode. (B) The ECL spectrum of the SQDs electrode.

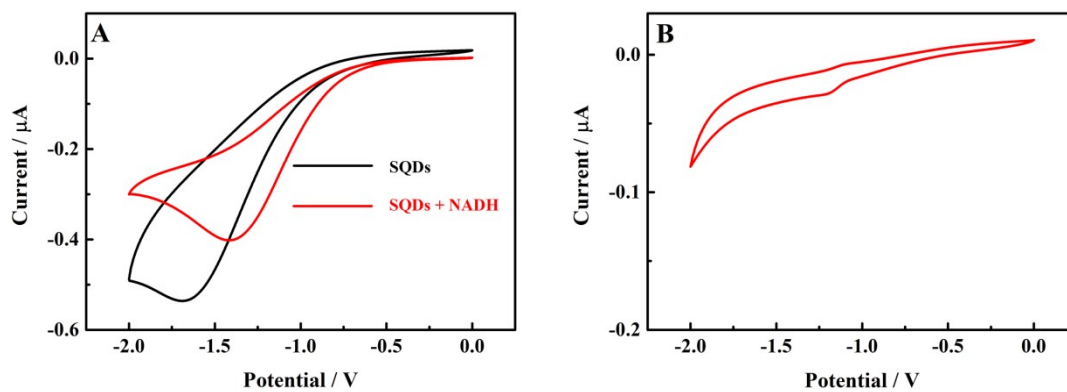

**Fig. S3.** (A) Cyclic voltammetry curves of the SQDs (black) and the SQDs with NADH (red). (B) Cyclic voltammetry curves of bare GCE with NADH in  $\text{K}_2\text{S}_2\text{O}_8$  solution.

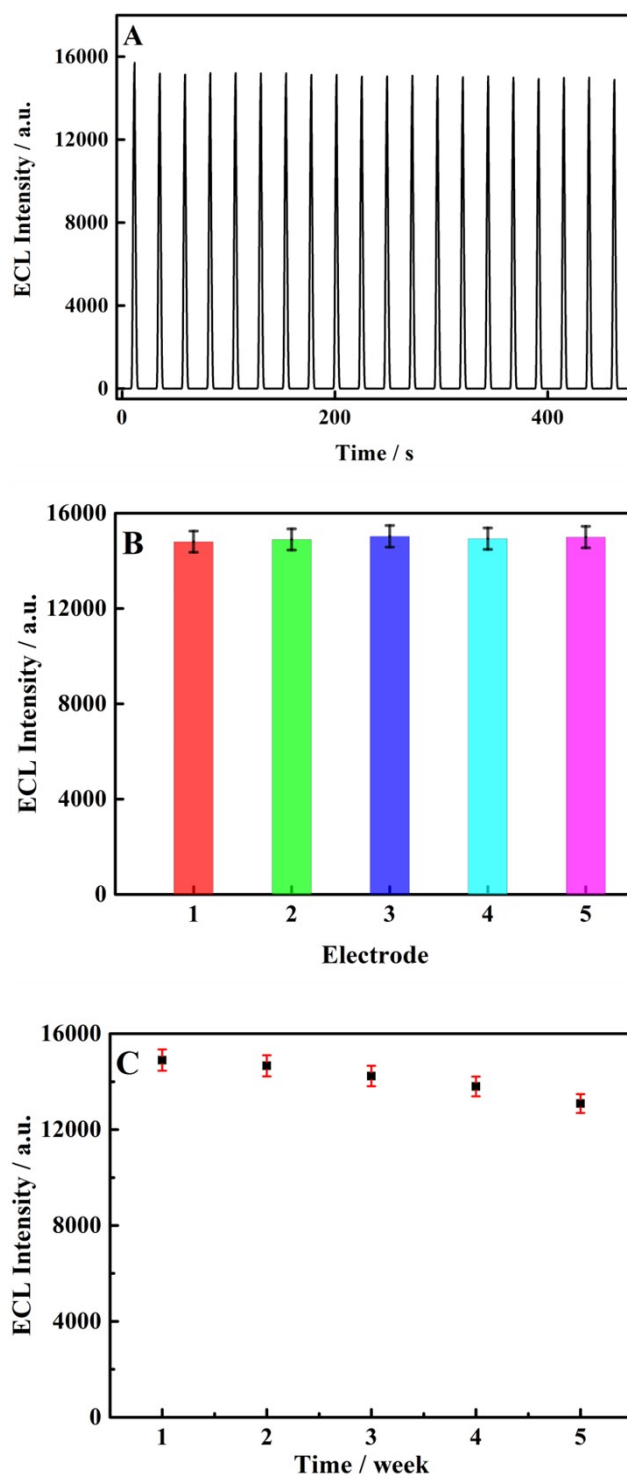

**Fig. S4.** (A) ECL behaviors of the SQDs under 20 continuously cyclic scans in PBS (0.1 M, pH = 7.4) containing 0.05 M  $K_2S_2O_8$ . (B) Repeatability of 5 different SQDs electrodes. (C) The stability of the same SQDs electrode over 5 weeks.

**Table S1. Comparison of the limit of detection (LOD) of this method introduced here with other reported methods.**

| Modified electrode materials                                                                         | Linear range / $\mu\text{M}$    | LOD / $\mu\text{M}$  | Ref.      |
|------------------------------------------------------------------------------------------------------|---------------------------------|----------------------|-----------|
| WS <sub>2</sub> nanosheets <sup>a</sup>                                                              | 2 to 2048                       | $5.7 \times 10^{-2}$ | [1]       |
| L1- ONP <sup>b</sup>                                                                                 | 0.1 to 0.6                      | $8.4 \times 10^{-2}$ | [2]       |
| PPD/GCE <sup>c</sup>                                                                                 | $10^{-1}$ to $10^{-3}$          | $8.1 \times 10^{-5}$ | [3]       |
| [Ru(bpy) <sub>2</sub> PVP <sub>10</sub> ] <sub>n</sub> (ClO <sub>4</sub> ) <sub>2</sub> <sup>d</sup> | $10^{-8}$ to $10^1$             | $5 \times 10^{-9}$   | [4]       |
| DDF/MWCNT <sup>e</sup>                                                                               | $10^{-3}$ to $8 \times 10^{-2}$ | $7 \times 10^{-4}$   | [5]       |
| G-DNA tetrahedron-AuNPs <sup>f</sup>                                                                 | $10^{-9}$ to $10^{-5}$          | $10^{-9}$            | [6]       |
| SQDs                                                                                                 | $10^{-6}$ to $10^1$             | $10^{-6}$            | This work |

<sup>a</sup> WS<sub>2</sub> nanosheets

<sup>b</sup> Imine linked dipodal receptor (L1) was synthesized and its organic nanoparticles

<sup>c</sup> Carbon paste electrodes coated with poly(o-phenylenediamine) (PPD) and poly(o-aminophenol) conducting films

<sup>d</sup> Metallopolymer–nanoparticle composites, bpy is 2,2'-bipyridyl and PVP is poly (4-vinylpyridine)

<sup>e</sup> 6,7-dihydroxy-3-methyl-9-thia-4,4a-diazafluoren-2-one/multi-wall carbon nanotubes

<sup>f</sup> Graphene-DNA tetrahedron-AuNPs modified gold disk electrode

## References

1. D. Doonyapisut, P. K. Kannan, B. Kim, C. H. Chung, *ChemElectroChem*, 2021, **8**, 4597-4604.
2. R. Kaura, J. S. Sidhu, N. Singh, I. Kaur, N. Kaur, *Sensor. Actuat. B-Chem.*, 2019, **293**, 144-150.
3. M. J. Lobo, A. J. Miranda, J. M. L. Fonseca, P. Tuñón, *Anal. Chim. Acta*, 1996, **325**, 33-42.
4. A. Devadoss, L. Dennany, C. Dickinson, T. E. Keyes, R. J. Forster, *Electrochem. Commun.*, 2012, **19**, 43-45.
5. L. Fotouhi, F. Raei, M. M. Heravi, D. Nematollahi, *J. Electroanal. Chem.*, 2010, **639**, 15-20.
6. Z. L. Li, W. Q. Su, S. P. Liu, X. T. Ding, *Biosens. Bioelectron.*, 2015, **69**, 287-293.
